# Supplementary material for: In situpretreatment during distillation improves corn fiber conversion and ethanol yield in the dry mill process
Source: Royal Society of Chemistry journal article supplement (doi:10.1039/c8gc03447h), 2019-01-01
Supplement: c8gc03447h1.pdf [file c8gc03447h1.pdf]

† **Electronic supplementary information**

**In-situ Pretreatment during Distillation Improves Corn Fiber Conversion and  
Ethanol Yield in Dry Mill Process**

Xiujuan Li,<sup>a,b#</sup> Zhaoxian Xu,<sup>a#</sup> Jianming Yu,<sup>a</sup> He Huang<sup>\*c,d</sup> and Mingjie Jin<sup>\*a</sup>

<sup>a</sup>. School of Environmental and Biological Engineering, Nanjing University of Science and Technology, 200 Xiaolingwei Street, Nanjing 210094, China. E-mail: jinmingjie@njust.edu.cn.

<sup>b</sup>. College of Biotechnology and Pharmaceutical Engineering, Nanjing Tech University, No. 30 South Puzhu Road, Nanjing 211816, China.

<sup>c</sup>. College of Pharmaceutical Sciences, Nanjing Tech University, Nanjing 211816, China.

<sup>d</sup>. Jiangsu National Synergetic Innovation Center for Advanced Materials (SICAM), Nanjing Tech University, Nanjing, China

# authors contributed equally.

ESI Table 1† Effect of pretreatment conditions on composition of stillage.

| Pretreatment conditions |                                                      | Composition after NaOH pretreatment |            | Composition after H <sub>2</sub> SO <sub>4</sub> pretreatment |            |
|-------------------------|------------------------------------------------------|-------------------------------------|------------|---------------------------------------------------------------|------------|
| T(°C)                   | NaOH or H <sub>2</sub> SO <sub>4</sub> loading, time | Glucan (%)                          | Xylan (%)  | Glucan (%)                                                    | Xylan (%)  |
| Control                 | --                                                   | 14.39±0.07                          | 11.66±0.09 |                                                               |            |
| 82                      | 1.0%, 30 min                                         | 9.58±0.07                           | 8.73±0.04  | 11.68±0.06                                                    | 8.94±0.08  |
|                         | 1.0%, 60 min                                         | 9.85±0.05                           | 7.80±0.04  | 11.46±0.11                                                    | 8.68±0.07  |
|                         | 1.0%, 90 min                                         | 10.01±0.04                          | 7.03±0.03  | 12.82±0.09                                                    | 7.37±0.08  |
|                         | 1.5%, 30 min                                         | 8.02±0.05                           | 6.86±0.05  | 10.84±0.04                                                    | 7.82±0.06  |
|                         | 1.5%, 60 min                                         | 9.05±0.07                           | 7.57±0.05  | 10.45±0.11                                                    | 7.46±0.03  |
|                         | 1.5%, 90 min                                         | 8.83±0.08                           | 6.74±0.04  | 10.93±0.06                                                    | 7.78±0.05  |
|                         | 2.0%, 30 min                                         | 8.88±0.05                           | 6.80±0.06  | 9.87±0.04                                                     | 7.05±0.05  |
|                         | 2.0%, 60 min                                         | 8.25±0.03                           | 6.85±0.06  | 11.03±0.07                                                    | 7.37±0.04  |
|                         | 2.0%, 90 min                                         | 8.15±0.08                           | 7.32±0.05  | 10.57±0.05                                                    | 6.88±0.06  |
| 90                      | 1.0%, 30 min                                         | 9.81±0.04                           | 7.82±0.08  | 11.36±0.11                                                    | 8.22±0.04  |
|                         | 1.0%, 60 min                                         | 10.47±0.06                          | 8.51±0.07  | 11.19±0.15                                                    | 7.97±0.06  |
|                         | 1.0%, 90 min                                         | 10.07±0.09                          | 6.91±0.08  | 11.42±0.18                                                    | 8.18±0.06  |
|                         | 1.5%, 30 min                                         | 9.24±0.05                           | 6.81±0.06  | 11.12±0.11                                                    | 7.88±0.03  |
|                         | 1.5%, 60 min                                         | 9.72±0.07                           | 7.04±0.03  | 11.44±0.19                                                    | 7.63±0.05  |
|                         | 1.5%, 90 min                                         | 9.36±0.09                           | 7.65±0.04  | 11.23±0.09                                                    | 7.21±0.05  |
|                         | 2.0%, 30 min                                         | 9.47±0.05                           | 7.26±0.03  | 11.57±0.08                                                    | 7.85±0.04  |
|                         | 2.0%, 60 min                                         | 8.78±0.18                           | 6.76±0.05  | 10.12±0.08                                                    | 6.87±0.04  |
| 2.0%, 90 min            | 8.91±0.09                                            | 6.97±0.05                           | 11.42±0.12 | 7.26±0.03                                                     |            |
| 95                      | 1.0%, 30 min                                         | 9.91±0.08                           | 7.85±0.05  | 11.68±0.09                                                    | 8.35±0.06  |
|                         | 1.0%, 60 min                                         | 9.85±0.05                           | 7.76±0.05  | 10.45±0.06                                                    | 7.35±0.03  |
|                         | 1.0%, 90 min                                         | 10.09±0.08                          | 7.9±0.04   | 11.64±0.04                                                    | 7.86±0.04  |
|                         | 1.5%, 30 min                                         | 9.42±0.07                           | 7.56±0.06  | 10.9±0.05                                                     | 7.34±0.04  |
|                         | 1.5%, 60 min                                         | 9.53±0.05                           | 7.13±0.06  | 10.37±0.03                                                    | 6.8±0.03   |
|                         | 1.5%, 90 min                                         | 9.42±0.04                           | 7.53±0.05  | 10.3±0.05                                                     | 6.74±0.05  |
|                         | 2.0%, 30 min                                         | 9.74±0.07                           | 6.45±0.05  | 10.03±0.04                                                    | 6.44±0.05  |
|                         | 2.0%, 60 min                                         | 9.53±0.05                           | 6.63±0.04  | 8.95±0.04                                                     | 5.8±0.04   |
| 2.0%, 90 min            | 8.88±0.07                                            | 7.16±0.06                           | 10.31±0.07 | 6.12±0.06                                                     |            |
| 100                     | 1.0%, 30 min                                         | 10.65±0.08                          | 8.69±0.06  | 12.88±0.09                                                    | 10.88±0.04 |
|                         | 1.0%, 60 min                                         | 10.12±0.05                          | 8.39±0.05  | 11.06±0.12                                                    | 8.18±0.04  |
|                         | 1.0%, 90 min                                         | 9.77±0.07                           | 8.23±0.05  | 10.97±0.09                                                    | 7.62±0.04  |
|                         | 1.5%, 30 min                                         | 9.69±0.08                           | 8.17±0.04  | 11.87±0.11                                                    | 9.1±0.06   |
|                         | 1.5%, 60 min                                         | 9.38±0.09                           | 7.42±0.06  | 10.80±0.09                                                    | 7.55±0.05  |
|                         | 1.5%, 90 min                                         | 9.11±0.08                           | 8.04±0.06  | 10.09±0.06                                                    | 6.82±0.06  |
|                         | 2.0%, 30 min                                         | 9.41±0.06                           | 7.33±0.03  | 9.88±0.05                                                     | 6.06±0.07  |
|                         | 2.0%, 60 min                                         | 8.88±0.07                           | 6.98±0.05  | 9.65±0.06                                                     | 5.52±0.09  |
|                         | 2.0%, 90 min                                         | 8.65±0.05                           | 7.23±0.05  | 9.37±0.08                                                     | 6.32±0.05  |

ESI Table 2† Effect of pretreatment conditions on enzymatic hydrolysis of stillage.

| Pretreatment conditions |                                                      | Enzymatic hydrolysis of NaOH pretreated stillage |              |                   |                  | Enzymatic hydrolysis of H <sub>2</sub> SO <sub>4</sub> pretreated stillage |              |                   |                  |
|-------------------------|------------------------------------------------------|--------------------------------------------------|--------------|-------------------|------------------|----------------------------------------------------------------------------|--------------|-------------------|------------------|
| T(°C)                   | NaOH or H <sub>2</sub> SO <sub>4</sub> loading, time | Glucose (g/L)                                    | Xylose (g/L) | Glucose yield (%) | Xylose yield (%) | Glucose (g/L)                                                              | Xylose (g/L) | Glucose yield (%) | Xylose yield (%) |
| Control                 | --                                                   | 13.40±0.11                                       | 0.00±0.00    | 41.31±0.32        | 0.00±0.00        |                                                                            |              |                   |                  |
| 82                      | 1.0%, 30 min                                         | 14.09±0.11                                       | 0.79±0.03    | 83.88±0.46        | 4.50±0.05        | 15.81±0.15                                                                 | 1.51±0.04    | 61.33±0.22        | 8.40±0.02        |
|                         | 1.0%, 60 min                                         | 15.29±0.09                                       | 0.79±0.04    | 82.44±0.52        | 5.03±0.04        | 15.98±0.19                                                                 | 1.75±0.04    | 67.83±0.52        | 10.02±0.05       |
|                         | 1.0%, 90 min                                         | 16.59±0.11                                       | 1.02±0.05    | 84.32±0.45        | 7.21±0.05        | 17.23±0.20                                                                 | 2.79±0.10    | 68.43±0.36        | 18.83±0.18       |
|                         | 1.5%, 30 min                                         | 16.09±0.16                                       | 0.94±0.05    | 90.95±0.44        | 6.81±0.04        | 16.61±0.18                                                                 | 2.68±0.04    | 70.48±0.53        | 17.03±0.14       |
|                         | 1.5%, 60 min                                         | 16.13±0.18                                       | 0.97±0.04    | 90.55±0.51        | 6.37±0.05        | 16.26±0.14                                                                 | 2.83±0.06    | 69.00±0.62        | 18.51±0.16       |
|                         | 1.5%, 90 min                                         | 15.92±0.11                                       | 0.92±0.06    | 91.61±0.46        | 6.78±0.03        | 17.31±0.09                                                                 | 3.31±0.05    | 70.12±0.55        | 21.15±0.19       |
|                         | 2.0%, 30 min                                         | 15.86±0.07                                       | 0.86±0.05    | 90.74±0.42        | 6.29±0.04        | 15.14±0.16                                                                 | 2.84±0.04    | 77.98±0.52        | 20.02±0.21       |
|                         | 2.0%, 60 min                                         | 15.12±0.18                                       | 0.81±0.05    | 92.98±0.29        | 5.88±0.03        | 17.47±0.11                                                                 | 3.38±0.03    | 75.73±0.49        | 22.80±0.18       |
|                         | 2.0%, 90 min                                         | 15.62±0.14                                       | 0.87±0.04    | 97.38±0.33        | 5.91±0.03        | 17.81±0.09                                                                 | 4.20±0.04    | 76.65±0.59        | 30.43±0.22       |
| 90                      | 1.0%, 30 min                                         | 17.54±0.14                                       | 0.94±0.06    | 90.91±0.43        | 5.97±0.03        | 17.62±0.18                                                                 | 2.55±0.04    | 78.86±0.35        | 15.42±0.09       |
|                         | 1.0%, 60 min                                         | 17.96±0.17                                       | 1.14±0.06    | 92.08±0.49        | 6.66±0.05        | 18.94±0.14                                                                 | 2.55±0.05    | 86.13±0.38        | 15.90±0.12       |
|                         | 1.0%, 90 min                                         | 17.68±0.11                                       | 1.03±0.03    | 89.21±0.51        | 7.41±0.05        | 19.13±0.16                                                                 | 3.59±0.05    | 85.79±0.41        | 20.60±0.18       |
|                         | 1.5%, 30 min                                         | 16.88±0.16                                       | 0.97±0.04    | 92.90±0.47        | 7.08±0.05        | 17.45±0.21                                                                 | 3.08±0.05    | 79.75±0.36        | 19.43±0.20       |
|                         | 1.5%, 60 min                                         | 16.72±0.14                                       | 0.83±0.04    | 87.43±0.42        | 5.86±0.06        | 19.03±0.15                                                                 | 3.81±0.04    | 84.50±0.42        | 24.82±0.19       |
|                         | 1.5%, 90 min                                         | 16.25±0.11                                       | 0.86±0.03    | 88.26±0.39        | 5.59±0.04        | 19.01±0.18                                                                 | 4.18±0.06    | 87.81±0.51        | 28.82±0.18       |
|                         | 2.0%, 30 min                                         | 16.84±0.19                                       | 0.71±0.05    | 90.38±0.43        | 4.86±0.03        | 18.77±0.18                                                                 | 3.72±0.06    | 82.50±0.37        | 23.56±0.21       |
|                         | 2.0%, 60 min                                         | 15.86±0.15                                       | 0.83±0.05    | 91.76±0.36        | 6.10±0.04        | 17.54±0.27                                                                 | 4.39±0.04    | 88.04±0.42        | 31.76±0.28       |
|                         | 2.0%, 90 min                                         | 16.15±0.12                                       | 0.81±0.05    | 92.17±0.44        | 5.78±0.05        | 18.71±0.18                                                                 | 4.88±0.04    | 83.26±0.44        | 33.41±0.31       |
| 95                      | 1.0%, 30 min                                         | 19.37±0.11                                       | 1.17±0.06    | 79.71±0.53        | 5.95±0.04        | 19.81±0.14                                                                 | 4.25±0.06    | 69.20±0.41        | 19.93±0.13       |
|                         | 1.0%, 60 min                                         | 19.64±0.18                                       | 1.13±0.07    | 82.68±0.55        | 5.81±0.06        | 19.96±0.09                                                                 | 4.85±0.04    | 76.73±0.30        | 26.33±0.18       |
|                         | 1.0%, 90 min                                         | 18.68±0.16                                       | 0.64±0.09    | 75.56±0.46        | 3.23±0.05        | 22.39±0.14                                                                 | 6.06±0.06    | 78.67±0.35        | 37.19±0.39       |
|                         | 1.5%, 30 min                                         | 18.22±0.11                                       | 0.94±0.05    | 78.89±0.38        | 4.96±0.04        | 21.39±0.12                                                                 | 6.23±0.05    | 80.07±0.32        | 33.89±0.29       |
|                         | 1.5%, 60 min                                         | 18.01±0.09                                       | 1.03±0.04    | 77.09±0.36        | 5.76±0.04        | 19.99±0.11                                                                 | 6.19±0.04    | 78.66±0.22        | 36.30±0.24       |
|                         | 1.5%, 90 min                                         | 17.89±0.16                                       | 0.86±0.04    | 77.50±0.43        | 4.56±0.04        | 20.03±0.09                                                                 | 6.6±0.06     | 78.36±0.30        | 39.08±0.26       |
|                         | 2.0%, 30 min                                         | 16.91±0.11                                       | 0.97±0.04    | 70.81±0.54        | 6.00±0.05        | 19.92±0.09                                                                 | 6.98±0.05    | 80.99±0.54        | 43.25±0.38       |
|                         | 2.0%, 60 min                                         | 16.31±0.16                                       | 0.81±0.06    | 69.80±0.43        | 4.82±0.03        | 19.57±0.16                                                                 | 6.45±0.07    | 89.27±0.36        | 44.38±0.32       |
|                         | 2.0%, 90 min                                         | 17.43±0.18                                       | 0.86±0.06    | 80.10±0.55        | 4.79±0.06        | 21.92±0.18                                                                 | 6.44±0.04    | 86.73±0.34        | 41.99±0.41       |
| 100                     | 1.0%, 30 min                                         | 20.22±0.11                                       | 1.24±0.06    | 77.45±0.38        | 5.69±0.04        | 21.85±0.27                                                                 | 3.91±0.06    | 69.24±0.36        | 14.29±0.11       |
|                         | 1.0%, 60 min                                         | 19.09±0.16                                       | 0.49±0.04    | 76.95±0.28        | 2.33±0.03        | 22.61±0.18                                                                 | 5.52±0.04    | 83.45±0.42        | 26.92±0.18       |
|                         | 1.0%, 90 min                                         | 19.39±0.18                                       | 0.76±0.04    | 81.01±0.22        | 3.69±0.02        | 23.58±0.17                                                                 | 7.16±0.04    | 87.72±0.52        | 37.47±0.24       |
|                         | 1.5%, 30 min                                         | 18.45±0.11                                       | 0.80±0.06    | 77.66±0.28        | 3.91±0.03        | 22.68±0.19                                                                 | 5.93±0.05    | 77.98±0.39        | 26.01±0.21       |
|                         | 1.5%, 60 min                                         | 18.65±0.15                                       | 0.94±0.07    | 81.10±0.36        | 5.06±0.04        | 22.79±0.14                                                                 | 7.74±0.03    | 86.11±0.44        | 40.93±0.38       |
|                         | 1.5%, 90 min                                         | 18.75±0.14                                       | 0.75±0.09    | 83.92±0.3         | 3.72±0.03        | 22.66±0.11                                                                 | 8.12±0.04    | 91.62±0.49        | 47.68±0.41       |
|                         | 2.0%, 30 min                                         | 17.37±0.16                                       | 1.02±0.05    | 75.30±0.42        | 5.55±0.04        | 21.87±0.14                                                                 | 7.89±0.04    | 90.34±0.53        | 51.93±0.48       |
|                         | 2.0%, 60 min                                         | 16.51±0.11                                       | 0.74±0.05    | 75.88±0.47        | 4.23±0.05        | 22.21±0.18                                                                 | 8.12±0.06    | 93.89±0.56        | 58.74±0.51       |
|                         | 2.0%, 90 min                                         | 17.66±0.15                                       | 0.88±0.05    | 83.36±0.51        | 4.86±0.05        | 22.63±0.15                                                                 | 8.22±0.03    | 96.57±0.46        | 51.91±0.47       |

Enzymatic hydrolysis of whole stillage was performed at 15% solid loading for 72 h. Cellulase and xylanase dosages were both 20 mg protein/g glucan.

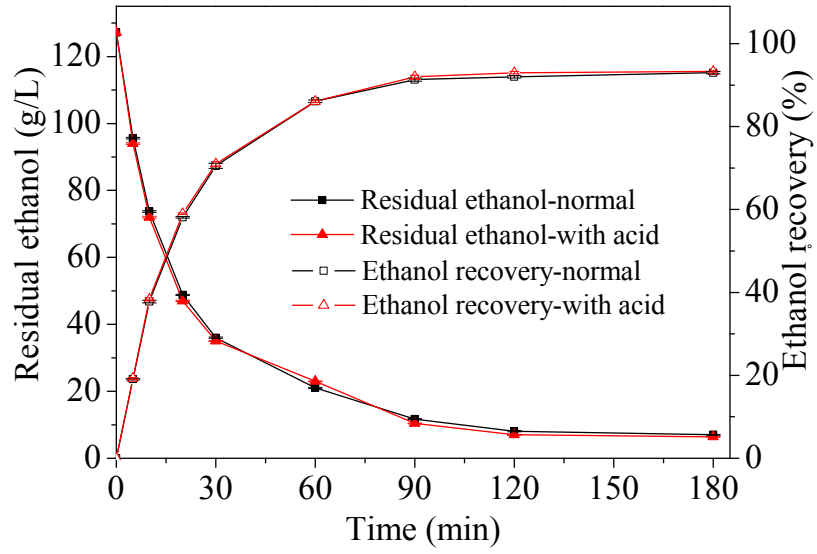

ESI Fig. 1† Effect of acid addition (1%, w/w) on corn-based ethanol distillation. **With the addition of 1% (w/w)  $H_2SO_4$ , the fermentation broth obtained from SSF with 30% (w/w) solid loading of corn was distilled at 95 °C under atmospheric pressure.**

ESI Table 3† Dynamic change of acid concentration during ethanol distillation.

| Distillation time (min) | Corn dry weight (w/w) | H <sub>2</sub> SO <sub>4</sub> (%) |     |     |
|-------------------------|-----------------------|------------------------------------|-----|-----|
| 0                       | 10.8                  | 0.6                                | 0.8 | 1.0 |
| 5                       | 11.5                  | 0.6                                | 0.9 | 1.1 |
| 10                      | 12.0                  | 0.7                                | 0.9 | 1.1 |
| 20                      | 12.8                  | 0.7                                | 1.0 | 1.2 |
| 30                      | 13.3                  | 0.7                                | 1.0 | 1.2 |
| 60                      | 13.9                  | 0.8                                | 1.0 | 1.3 |
| 90                      | 14.3                  | 0.8                                | 1.1 | 1.3 |
